# Supplementary material for: Controllable Crimpness of Animal Hairs via Water-Stimulated Shape Fixation for Regulation of Thermal Insulation
Source: MDPI journal article supplement (doi:10.3390/polym11010172), 2019-01-18
Supplement: s1 [file s1]

### Thermal insulation of hairs in different states

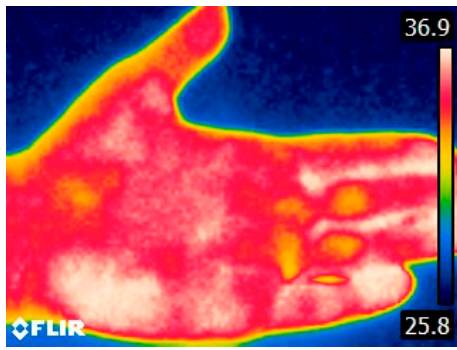

Pure hand

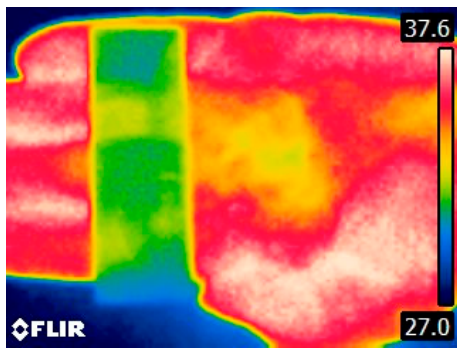

Natural original yak hairs

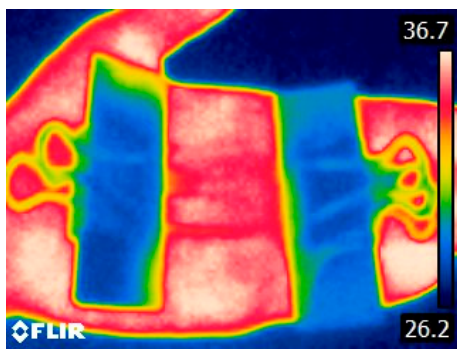

Stretched dry hairs

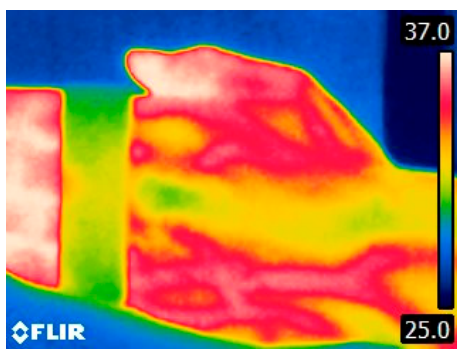

Shape fixed hairs
